# Supplementary material
Source: PubMed Central journal article supplement (PMC2575072)
Supplement: NIHMS58017-supplement-01.pdf [file NIHMS58017-supplement-01.pdf]

## Inhibition of Growth Hormone Signaling by the Fasting-Induced Hormone FGF21

Takeshi Inagaki, Vicky Y. Lin, Regina Goetz, Moosa Mohammadi, David J. Mangelsdorf, and  
Steven A. Kliewer

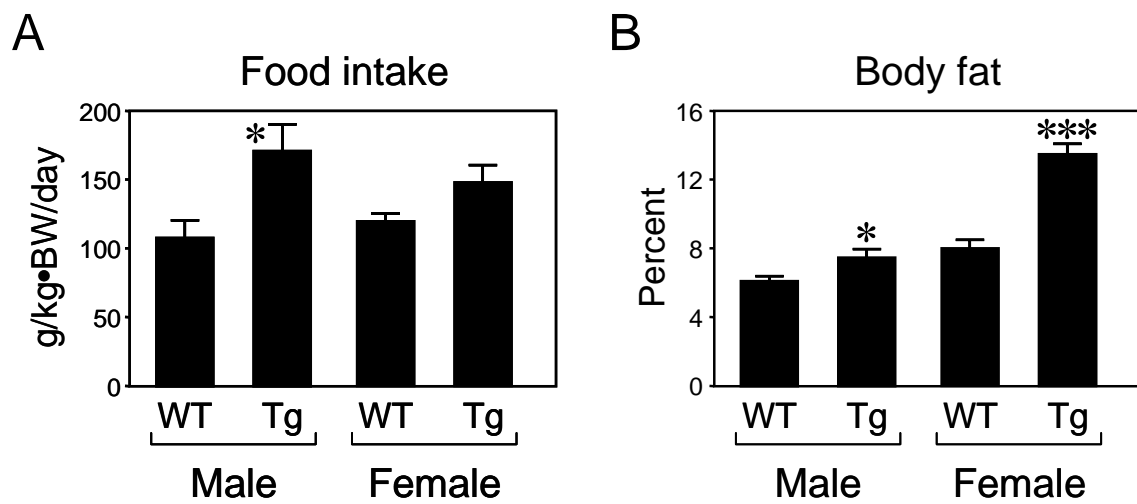

**Figure S1.**

(A) Food intake was measured during a 4 day period in male and female wild type (WT) and FGF21-transgenic (Tg) mice individually housed in metabolic cages.

(B) Percent body fat was measured by dual energy X-ray absorptiometry in male and female WT and Tg mice. \*,  $P < 0.05$ ; \*\*\*,  $P < 0.001$ .

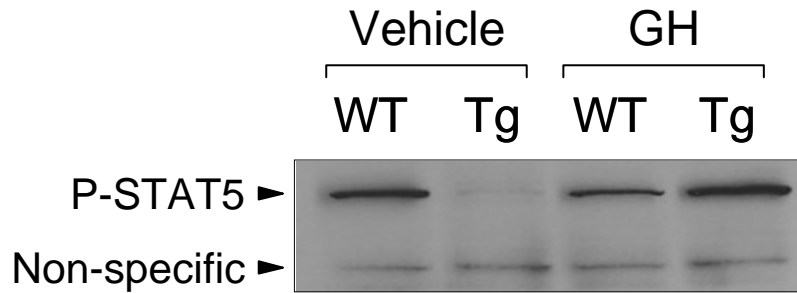

**Figure S2.**

Wild type (WT) or FGF21-transgenic (Tg) mice (n = 2 mice/group) were injected intraperitoneally with GH (1  $\mu\text{g/g}$  body weight) or saline (vehicle) and killed 15 minutes later. Total STAT5 was immunoprecipitated from pooled liver nuclear extracts (100  $\mu\text{g}$  total) from each group using a STAT5 antibody (Santa Cruz Biotechnology, Santa Cruz, CA) and the Protein G Immunoprecipitation Kit (Roche Applied Science, Germany). Immunoblotting was performed using a phospho-STAT5 antibody (Cell Signaling Technology, Danvers MA). Similar results were obtained in two independent experiments.

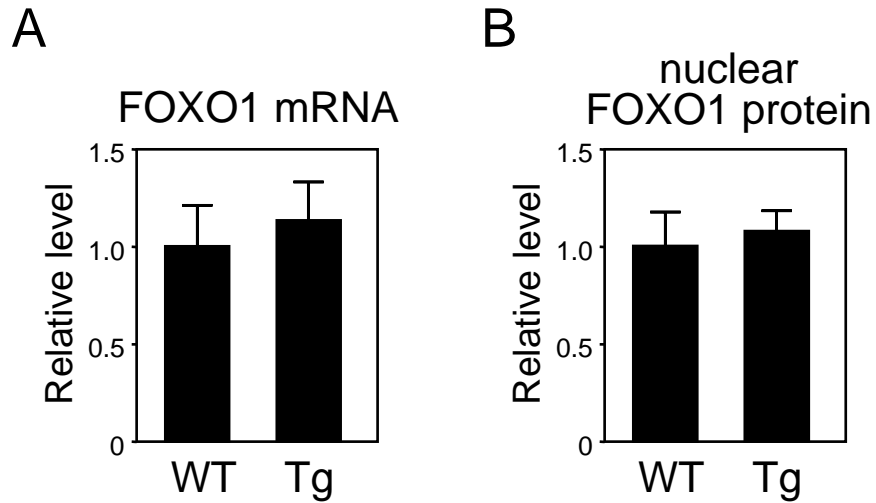

**Figure S3.**

(A) FOXO1 mRNA was measured by RT-qPCR using RNA prepared from livers of wild type (WT) and FGF21-transgenic (Tg) mice.

(B) FOXO1 protein was measured by western blot in nuclear extracts from WT and Tg mice. The same nuclear extracts were used as in Figure 3 of the paper. Mice were killed during the middle of the light cycle. Data were quantified by scanning densitometry and normalized to lamin B. n = 4 mice/group.

**A**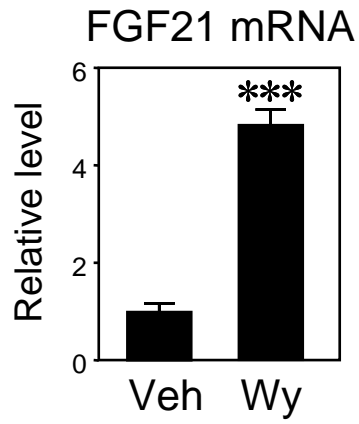**B**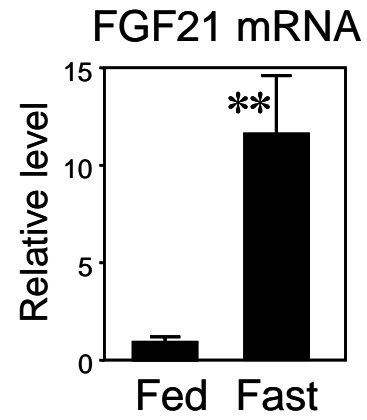**Figure S4.**

(A) Mice were administered vehicle (Veh) or Wy14643 (Wy) for 10 days or (B) were fed or fasted for 24 hours. FGF21 mRNA levels were measured by RT-qPCR.  $n = 4-6$  mice/group. Male mice were used in the FGF21 experiment and female mice in the Wy14643 experiment. \*\*,  $P < 0.01$ ; \*\*\*,  $P < 0.001$ .
